# Supplementary material for: High-throughput development of highly active catalyst system to convert bioethanol to 1,3-butadiene
Source: Royal Society of Chemistry journal article supplement (doi:10.1039/d1re00232e), 2021-01-01
Supplement: d1re00232e1.pdf [file d1re00232e1.pdf]

## Electronic Supplementary Information

### High-throughput development of highly active catalyst system to convert bioethanol to 1,3-butadiene

Yu Shinke<sup>a,b</sup>, Tomohisa Miyazawa<sup>c</sup>, Misao Hiza<sup>b</sup>, Isao Nakamura<sup>c</sup>, Tadahiro Fujitani<sup>\*c</sup>

<sup>a</sup> *Research Association of High-Throughput Design and Development for Advanced Functional Materials (ADMAT), Tsukuba, Ibaraki 305-8565, Japan.*

<sup>b</sup> *Advanced Materials Innovation Team, Research & Development Center, The Yokohama Rubber Co., Ltd., Hiratsuka, Kanagawa 254-8601, Japan.*

<sup>c</sup> *Interdisciplinary Research Center for Catalytic Chemistry, National Institute of Advanced Industrial Science and Technology (AIST), Tsukuba, Ibaraki 305-8565, Japan. E-mail: t-fujitani@aist.go.jp*

## Contents

|                                                     |     |
|-----------------------------------------------------|-----|
| Lebedev and Ostromyslensky processes (Fig. S1)..... | S2  |
| Fig. S2.....                                        | S3  |
| Fig. S3.....                                        | S3  |
| Experimental Procedures.....                        | S4  |
| 1. Catalyst Preparation                             |     |
| 2. Catalytic Activity Evaluation                    |     |
| 3. Catalyst Characterization                        |     |
| Table S1.....                                       | S6  |
| Table S2.....                                       | S7  |
| Fig. S4.....                                        | S8  |
| Fig. S5.....                                        | S8  |
| Table S3.....                                       | S9  |
| Table S4.....                                       | S10 |
| Fig. S6.....                                        | S11 |
| Fig. S7.....                                        | S12 |
| Fig. S8.....                                        | S13 |
| Fig. S9.....                                        | S13 |
| Fig. S10.....                                       | S14 |
| Fig. S11.....                                       | S14 |

## Lebedev and Ostromyslensky processes

The ETB reactions were first reported in the early 20th century by Lebedev [S1] and Ostromyslensky [S2]. Lebedev used aluminum and zinc oxides catalysts at 673 K for one-step reaction. Ostromyslensky proposed a conversion from a mixture of ethanol and acetaldehyde over alumina or clay catalysts at 713–733 K, yielding 18% of BD. It was theoretically a two-step process from ethanol to butadiene, involving dehydrogenation of ethanol to acetaldehyde in a separate step.

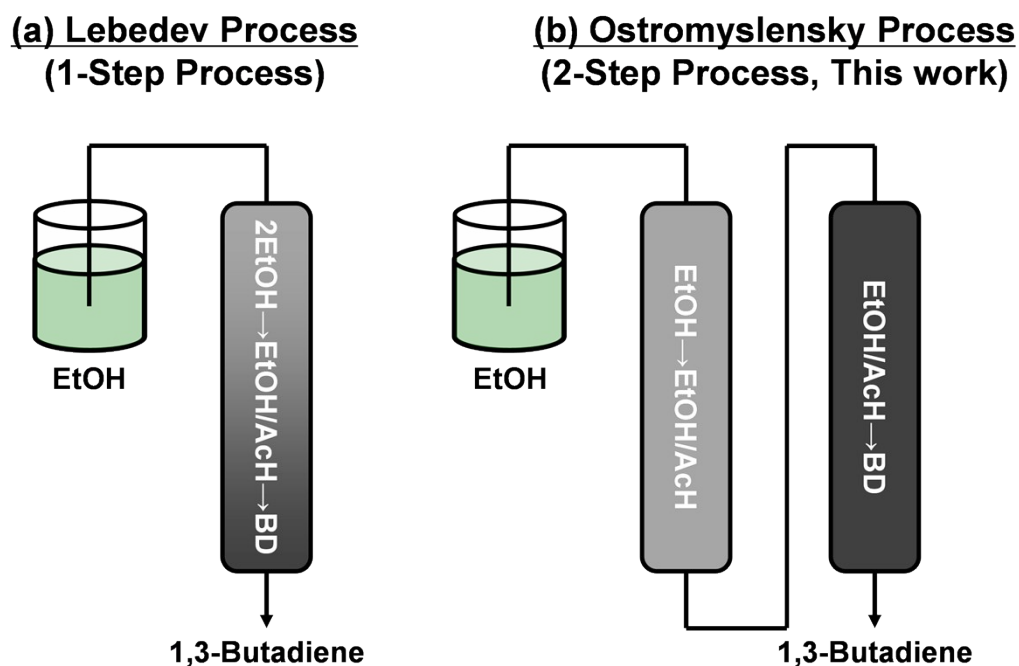

**Figure S1** Diagrams of Lebedev (a) and Ostromyslensky (b) processes.

[S1] S.V. Lebedev, A.O. Yakubchik, J. Chem. Soc., (1929) 220–225.

[S2] J. Ostromyslensky, J. Russ. Phys. Chem. Soc., 47 (1915) 1472-1506.

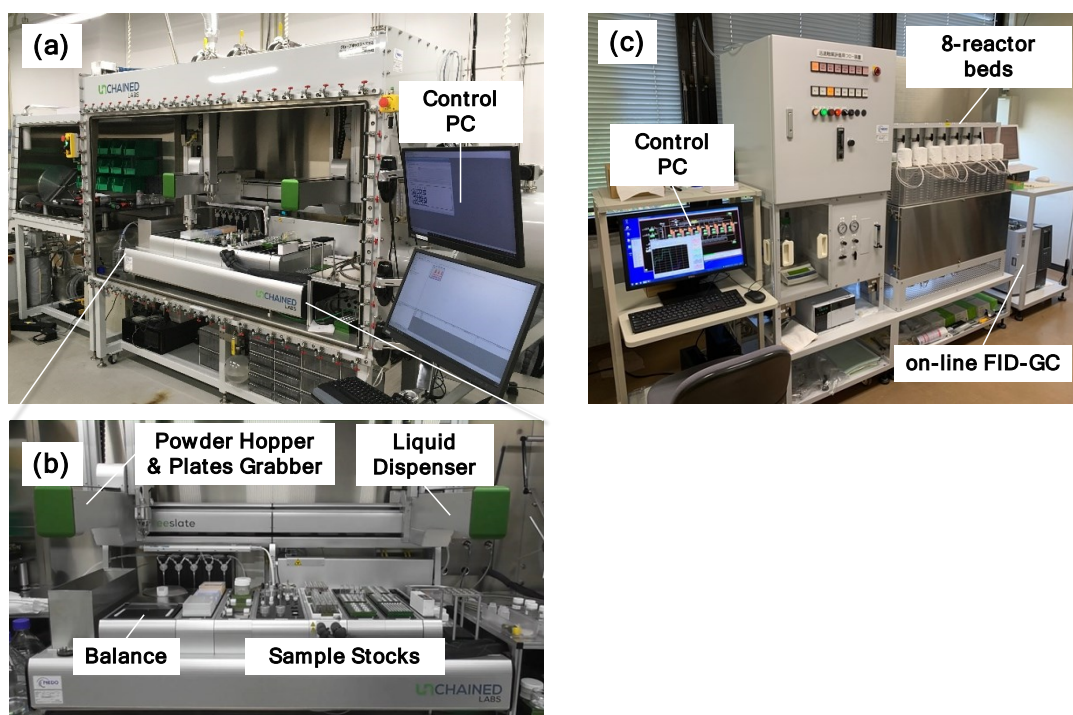

**Figure S2** Photographs of the high-throughput apparatus for the catalyst preparation (a,b) and the evaluation of catalytic activity (c).

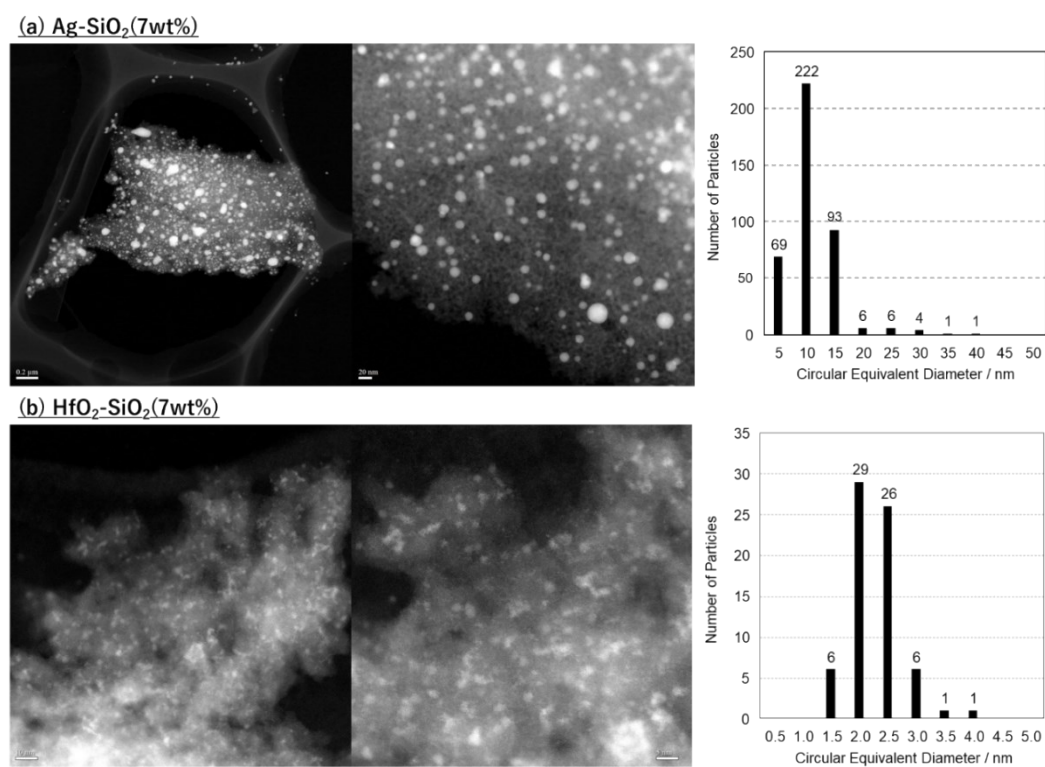

**Figure S3** DF-STEM images and particle size distributions of (a) Ag/SiO<sub>2</sub> and (b) HfO<sub>2</sub>/SiO<sub>2</sub> catalysts.

## Experimental Procedures

### 1. Catalyst Preparation

CARiACT SiO<sub>2</sub> (Fuji Silysia Chemical, G-6 grade; particle size = 75–150 µm; average pore diameter = 6 nm; pore volume = 0.7 mL/g; surface area = 500 m<sup>2</sup>/g) was used as the catalyst support. Various SiO<sub>2</sub>-supported metal oxides were prepared by a pore-filling impregnation method using a high-throughput catalyst preparation system (freeslate, Unchained Labs, Fig. S2(a) and (b)). Metal nitrates, metal chlorides, a hydrogen tetrachloroaurate(III) tetrahydrate, and a zirconium oxynitrate were used as the precursors of metal oxides. These precursors were dissolved in an amount of water equal to the pore volume of SiO<sub>2</sub>, whose solutions in glass vials were placed in an aluminum plate dedicated to the high-throughput system. On the other hand, the dried SiO<sub>2</sub> at 383 K for 1 h was placed in a hopper equipped with the high-throughput system. Then, the aqueous solutions of precursors were automatically impregnated to a predetermined amount of SiO<sub>2</sub> by the protocols programmed on the software. The impregnated sample was dried at 383 K for 5 h and then calcined at 773 K for 3 h. Calcination time was 5 h when using metal chlorides for the precursors. The metal oxide loading in supported catalyst was 5 wt%.

On the other hand, the mixed-metal-oxide catalysts (Ag-HfO<sub>2</sub>/SiO<sub>2</sub> and ZnO-ZrO<sub>2</sub>/SiO<sub>2</sub>) were prepared by a two-step pore-filling impregnation procedure. Specifically, an aqueous solution of Ag nitrate or Zn nitrate was firstly added dropwise to SiO<sub>2</sub>, and the impregnated sample was dried at 383 K for 5 h and then calcined at 773 K for 3 h. Subsequently, an aqueous solution of Hf chloride or Zr nitrate was added to calcined sample, which was dried at 383 K for 5 h and then calcined at 773 K for 5 h.

### 2. Catalytic Activity Evaluation

The catalytic reactions were performed at 548–698 K and atmospheric pressure using a high-throughput reactor system with 8-parallel catalyst reactor (S-14-8Rx, Taiyo System Co., Ltd., Fig. S2(c)). EtOH used in the reaction was purchased from Imazu Chemical Co., Ltd. The reactor is made of quartz glass and has an inner diameter of 10 mm. Typically, 0.30 g of catalyst was placed in the reactor and heated to the desired temperature at 10 K min<sup>-1</sup> under flowing N<sub>2</sub>. Once the desired temperature was reached, EtOH was introduced into the reactor via a plunger pump (Shimadzu LC-20AT dual reciprocating plunger HPLC pump). Weight hourly space velocity (WHSV) was used as the contact time for the catalytic reaction. In a typical catalytic activity test experiment, 0.3 g of catalyst was used and EtOH was supplied at 0.3 mL min<sup>-1</sup> (1.41 g h<sup>-1</sup>), resulting in a WHSV of 4.7 h<sup>-1</sup>. The products were analyzed with an on-line gas chromatograph equipped with a flame ionization detector. The reaction products were quantified by means of an absolute calibration method. EtOH conversion and product selectivity were calculated as follows:

$$\text{EtOH conversion} = \left(1 - \frac{\text{unreacted EtOH C number}}{\text{total C number}}\right) \times 100\%$$

$$\text{Selectivity} = \frac{\text{product C number}}{\text{total products C number}} \times 100\%$$

$$Yield = EtOH\ Conversion \times Selectivity \times 100\%$$

In the case of EtOH/AcH reactions, conversion and selectivity were calculated by the following equations [S3].

$$Conversion = \left( 1 - \frac{unreacted\ EtOH\ C\ number + unreacted\ AcH\ C\ number}{total\ C\ number} \right) \times 100\%$$

$$Selectivity = \frac{product\ C\ number}{total\ products\ C\ number} \times 100\%$$

$$Yield = Total\ conversion \times Selectivity \times 100\%$$

We conducted multiple catalytic activity tests on each sample and confirmed the reproducibility of the experiments. The experimental error of the product selectivity was typically <0.05%.

[S3] H.J. Chae, T.W. Kim, Y.K. Moon, H.K. Kim, K.E. Jeong, C.U. Kim, S.Y. Jeong, Appl. Catal. B, 150 (2014) 596-604.

### 3. Catalyst Characterization

Dark field scanning transmission electron microscopy (DF-STEM) images were taken on an JEM-2100F Field Emission Electron Microscope (JEOL) operating at 120 kV. Temperature programmed desorption (TPD) of NH<sub>3</sub> was performed using BELCAT (Microtrac BEL) equipped with thermal conductivity detector. At first, the samples were heated at 823 K in an Ar flow with a ramp of 5 K/min. Then the samples were cooled to ambient temperature, and gas flow switched to 10% NH<sub>3</sub>/Ar mixture for 30 min. After being purged with pure He for 2 h at 373 K, the sample was heated at 10 K/min to 973 K under He flow. The desorbed amounts of NH<sub>3</sub> were determined by calibration of the TCD signal.

**Table S1** EtOH conversion reactions with various SiO<sub>2</sub> supported catalysts prepared using a high-throughput system.

| Catalyst                        | EtOH conv.<br>/ % | AcH yield<br>/ % | Selectivity / % |     |          |                |           |                |        |
|---------------------------------|-------------------|------------------|-----------------|-----|----------|----------------|-----------|----------------|--------|
|                                 |                   |                  | BD              | AcH | Ethylene | Crotonaldehyde | 1-Butanol | Crotyl Alcohol | Others |
| CuO                             | 74                | 70               | 0               | 95  | 0        | 0              | 0         | 0              | 4      |
| Ag                              | 55                | 52               | 0               | 94  | 1        | 1              | 0         | 0              | 3      |
| SnO <sub>2</sub>                | 46                | 40               | 0               | 88  | 7        | 0              | 0         | 0              | 4      |
| IrO <sub>2</sub>                | 37                | 25               | 0               | 68  | 29       | 0              | 0         | 0              | 2      |
| ZnO                             | 32                | 22               | 9               | 68  | 7        | 6              | 1         | 0              | 9      |
| MoO <sub>3</sub>                | 53                | 19               | 5               | 37  | 48       | 0              | 0         | 0              | 10     |
| Ga <sub>2</sub> O <sub>3</sub>  | 52                | 19               | 6               | 36  | 23       | 0              | 0         | 0              | 35     |
| V <sub>2</sub> O <sub>5</sub>   | 32                | 14               | 3               | 45  | 45       | 2              | 0         | 0              | 5      |
| Nb <sub>2</sub> O <sub>5</sub>  | 19                | 13               | 1               | 68  | 31       | 0              | 0         | 0              | 0      |
| NiO                             | 12                | 8                | 1               | 70  | 0        | 1              | 2         | 2              | 25*    |
| Co <sub>3</sub> O <sub>4</sub>  | 8                 | 6                | 1               | 82  | 4        | 3              | 0         | 3              | 6      |
| ZrO <sub>2</sub>                | 10                | 6                | 1               | 62  | 38       | 0              | 0         | 0              | 0      |
| In <sub>2</sub> O <sub>3</sub>  | 7                 | 6                | 0               | 92  | 6        | 0              | 0         | 0              | 1      |
| Cr <sub>2</sub> O <sub>3</sub>  | 16                | 6                | 15              | 37  | 31       | 1              | 3         | 0              | 13     |
| Se <sub>2</sub> O <sub>3</sub>  | 13                | 6                | 1               | 45  | 52       | 0              | 0         | 0              | 3      |
| ReO <sub>3</sub>                | 6                 | 5                | 0               | 95  | 4        | 0              | 0         | 0              | 1      |
| Fe <sub>2</sub> O <sub>3</sub>  | 7                 | 5                | 2               | 64  | 21       | 2              | 0         | 0              | 10     |
| Al <sub>2</sub> O <sub>3</sub>  | 89                | 3                | 0               | 3   | 97       | 0              | 0         | 0              | 0      |
| TiO <sub>2</sub>                | 7                 | 2                | 1               | 36  | 33       | 1              | 0         | 0              | 29     |
| Rh <sub>2</sub> O <sub>3</sub>  | 3                 | 2                | 0               | 60  | 38       | 0              | 0         | 0              | 1      |
| MgO                             | 5                 | 2                | 0               | 33  | 65       | 0              | 0         | 0              | 1      |
| Au                              | 2                 | 1                | 0               | 82  | 14       | 1              | 0         | 0              | 2      |
| MnO <sub>2</sub>                | 2                 | 1                | 1               | 78  | 10       | 1              | 1         | 2              | 7      |
| Pb <sub>3</sub> O <sub>4</sub>  | 1                 | 1                | 11              | 88  | 0        | 0              | 0         | 0              | 1      |
| RuO <sub>2</sub>                | 1                 | 1                | 0               | 77  | 20       | 0              | 0         | 0              | 3      |
| HfO <sub>2</sub>                | 10                | 1                | 1               | 11  | 49       | 0              | 0         | 0              | 40     |
| Tb <sub>4</sub> O <sub>7</sub>  | 2                 | 1                | 3               | 30  | 40       | 0              | 2         | 0              | 26     |
| Sm <sub>2</sub> O <sub>3</sub>  | 2                 | 1                | 3               | 36  | 32       | 0              | 3         | 1              | 25     |
| PdO                             | 14                | 1                | 0               | 4   | 0        | 0              | 0         | 0              | 96*    |
| Pr <sub>6</sub> O <sub>11</sub> | 1                 | 1                | 3               | 38  | 34       | 0              | 3         | 1              | 20     |
| Dy <sub>2</sub> O <sub>3</sub>  | 2                 | 1                | 1               | 21  | 51       | 0              | 1         | 0              | 26     |
| Lu <sub>2</sub> O <sub>3</sub>  | 3                 | 0                | 1               | 14  | 54       | 0              | 0         | 0              | 31     |
| Y <sub>2</sub> O <sub>3</sub>   | 3                 | 0                | 1               | 13  | 54       | 0              | 0         | 0              | 30     |
| Tm <sub>2</sub> O <sub>3</sub>  | 3                 | 0                | 1               | 15  | 54       | 0              | 0         | 0              | 30     |
| BaO                             | 1                 | 0                | 0               | 82  | 15       | 0              | 0         | 0              | 3      |
| Er <sub>2</sub> O <sub>3</sub>  | 3                 | 0                | 1               | 16  | 54       | 0              | 0         | 0              | 29     |
| Eu <sub>2</sub> O <sub>3</sub>  | 1                 | 0                | 1               | 31  | 41       | 0              | 0         | 0              | 27     |
| Ta <sub>2</sub> O <sub>5</sub>  | 1                 | 0                | 0               | 26  | 43       | 0              | 0         | 0              | 30     |
| Gd <sub>2</sub> O <sub>3</sub>  | 2                 | 0                | 1               | 19  | 52       | 0              | 0         | 0              | 28     |
| La <sub>2</sub> O <sub>3</sub>  | 1                 | 0                | 1               | 31  | 39       | 1              | 2         | 1              | 26     |
| Nd <sub>2</sub> O <sub>3</sub>  | 1                 | 0                | 1               | 21  | 49       | 0              | 1         | 0              | 28     |
| LiO <sub>2</sub>                | 1                 | 0                | 0               | 37  | 4        | 1              | 0         | 1              | 57     |
| CeO <sub>2</sub>                | 0                 | 0                | 0               | 56  | 33       | 0              | 0         | 0              | 9      |
| SrO                             | 1                 | 0                | 1               | 32  | 54       | 0              | 1         | 1              | 12     |
| CaO                             | 1                 | 0                | 1               | 22  | 68       | 0              | 0         | 0              | 8      |
| Cs <sub>2</sub> O               | 0                 | 0                | 0               | 56  | 35       | 1              | 0         | 0              | 7      |
| Na <sub>2</sub> O               | 0                 | 0                | 1               | 52  | 29       | 0              | 0         | 0              | 18     |
| K <sub>2</sub> O                | 0                 | 0                | 0               | 50  | 42       | 0              | 0         | 0              | 7      |
| Rb <sub>2</sub> O               | 1                 | 0                | 0               | 17  | 34       | 3              | 1         | 0              | 45     |

Reaction conditions: EtOH feed rate: 0.03 mL min<sup>-1</sup>, carrier gas (N<sub>2</sub>) feed rate: 10 mL min<sup>-1</sup>, temperature: 623 K, WHSV: 4.7 h<sup>-1</sup>, loading amount: 5 wt%.

\*The others were CH<sub>4</sub> and CO produced by the decomposition reaction of EtOH.

**Table S2** EtOH conversion reactions with various SiO<sub>2</sub> supported catalysts prepared using a high-throughput system.

| Catalyst                        | EtOH conv.<br>/ % | AcH yield<br>/ % | Selectivity / % |     |          |                |           |                |        |
|---------------------------------|-------------------|------------------|-----------------|-----|----------|----------------|-----------|----------------|--------|
|                                 |                   |                  | BD              | AcH | Ethylene | Crotonaldehyde | 1-Butanol | Crotyl Alcohol | Others |
| Ag                              | 69                | 63               | 0               | 92  | 2        | 1              | 0         | 0              | 4      |
| SnO <sub>2</sub>                | 55                | 50               | 0               | 92  | 6        | 0              | 0         | 0              | 1      |
| ZnO                             | 70                | 40               | 12              | 58  | 9        | 7              | 1         | 0              | 13     |
| Nb <sub>2</sub> O <sub>5</sub>  | 66                | 30               | 2               | 45  | 52       | 0              | 0         | 0              | 1      |
| Ga <sub>2</sub> O <sub>3</sub>  | 86                | 29               | 11              | 33  | 42       | 1              | 0         | 0              | 13     |
| V <sub>2</sub> O <sub>5</sub>   | 73                | 27               | 4               | 37  | 50       | 2              | 0         | 0              | 6      |
| MoO <sub>3</sub>                | 65                | 23               | 6               | 35  | 54       | 0              | 0         | 0              | 5      |
| In <sub>2</sub> O <sub>3</sub>  | 15                | 14               | 0               | 92  | 6        | 0              | 0         | 0              | 1      |
| ZrO <sub>2</sub>                | 32                | 14               | 2               | 42  | 56       | 0              | 0         | 0              | 0      |
| Cr <sub>2</sub> O <sub>3</sub>  | 38                | 13               | 13              | 35  | 37       | 1              | 2         | 0              | 12     |
| ReO <sub>3</sub>                | 18                | 13               | 1               | 73  | 23       | 0              | 0         | 0              | 3      |
| CuO                             | 13                | 13               | 0               | 94  | 4        | 0              | 0         | 0              | 1      |
| Sc <sub>2</sub> O <sub>3</sub>  | 41                | 12               | 2               | 29  | 68       | 0              | 0         | 0              | 1      |
| Co <sub>3</sub> O <sub>4</sub>  | 15                | 12               | 1               | 82  | 7        | 3              | 1         | 2              | 4      |
| Fe <sub>2</sub> O <sub>3</sub>  | 21                | 11               | 3               | 53  | 31       | 2              | 1         | 0              | 11     |
| IrO <sub>2</sub>                | 30                | 11               | 0               | 36  | 63       | 0              | 0         | 0              | 0      |
| TiO <sub>2</sub>                | 26                | 6                | 3               | 24  | 45       | 0              | 0         | 0              | 28     |
| MnO <sub>2</sub>                | 8                 | 5                | 4               | 70  | 10       | 2              | 2         | 4              | 8      |
| Au                              | 6                 | 5                | 1               | 78  | 16       | 1              | 0         | 1              | 3      |
| MgO                             | 17                | 4                | 1               | 26  | 74       | 0              | 0         | 0              | 0      |
| HfO <sub>2</sub>                | 32                | 3                | 2               | 9   | 68       | 0              | 0         | 0              | 21     |
| Rh <sub>2</sub> O <sub>3</sub>  | 3                 | 2                | 0               | 91  | 8        | 0              | 0         | 0              | 1      |
| Tb <sub>4</sub> O <sub>7</sub>  | 11                | 2                | 7               | 19  | 54       | 0              | 2         | 0              | 18     |
| RuO <sub>2</sub>                | 2                 | 2                | 0               | 83  | 13       | 0              | 0         | 0              | 2      |
| Y <sub>2</sub> O <sub>3</sub>   | 16                | 2                | 5               | 11  | 64       | 0              | 1         | 0              | 19     |
| Pr <sub>6</sub> O <sub>11</sub> | 7                 | 2                | 8               | 26  | 47       | 0              | 4         | 0              | 15     |
| Dy <sub>2</sub> O <sub>3</sub>  | 13                | 2                | 4               | 14  | 62       | 0              | 1         | 0              | 18     |
| Lu <sub>2</sub> O <sub>3</sub>  | 16                | 2                | 2               | 11  | 66       | 0              | 1         | 0              | 20     |
| Pb <sub>3</sub> O <sub>4</sub>  | 3                 | 2                | 1               | 59  | 37       | 0              | 0         | 0              | 3      |
| Sm <sub>2</sub> O <sub>3</sub>  | 8                 | 2                | 6               | 21  | 50       | 0              | 3         | 0              | 19     |
| BaO                             | 2                 | 2                | 0               | 73  | 24       | 1              | 0         | 0              | 2      |
| LiO <sub>2</sub>                | 2                 | 2                | 0               | 85  | 8        | 0              | 0         | 0              | 6      |
| Tm <sub>2</sub> O <sub>3</sub>  | 13                | 1                | 1               | 12  | 65       | 0              | 1         | 0              | 21     |
| Eu <sub>2</sub> O <sub>3</sub>  | 5                 | 1                | 4               | 28  | 51       | 0              | 2         | 0              | 16     |
| Er <sub>2</sub> O <sub>3</sub>  | 12                | 1                | 2               | 12  | 65       | 0              | 1         | 0              | 20     |
| Ta <sub>2</sub> O <sub>5</sub>  | 5                 | 1                | 1               | 27  | 48       | 0              | 0         | 0              | 23     |
| CeO <sub>2</sub>                | 3                 | 1                | 2               | 52  | 34       | 0              | 2         | 1              | 9      |
| Gd <sub>2</sub> O <sub>3</sub>  | 9                 | 1                | 3               | 15  | 63       | 0              | 1         | 0              | 17     |
| La <sub>2</sub> O <sub>3</sub>  | 5                 | 1                | 7               | 25  | 46       | 0              | 5         | 0              | 17     |
| Nd <sub>2</sub> O <sub>3</sub>  | 6                 | 1                | 3               | 16  | 62       | 0              | 1         | 0              | 18     |
| Al <sub>2</sub> O <sub>3</sub>  | 94                | 1                | 0               | 1   | 99       | 0              | 0         | 0              | 0      |
| SrO                             | 3                 | 1                | 1               | 26  | 66       | 0              | 1         | 1              | 5      |
| CaO                             | 4                 | 1                | 1               | 17  | 76       | 0              | 1         | 0              | 5      |
| Cs <sub>2</sub> O               | 2                 | 1                | 1               | 36  | 61       | 0              | 0         | 0              | 2      |
| K <sub>2</sub> O                | 1                 | 0                | 0               | 55  | 41       | 0              | 0         | 0              | 3      |
| Rb <sub>2</sub> O               | 2                 | 0                | 1               | 19  | 75       | 0              | 0         | 0              | 5      |
| Na <sub>2</sub> O               | 1                 | 0                | 1               | 56  | 36       | 0              | 0         | 0              | 7      |
| PdO                             | 1                 | 0                | 0               | 64  | 0        | 0              | 0         | 0              | 35*    |
| NiO                             | 100               | 0                | 0               | 0   | 0        | 0              | 0         | 0              | 100*   |

Reaction conditions: EtOH feed rate: 0.03 mL min<sup>-1</sup>, carrier gas (N<sub>2</sub>) feed rate: 10 mL min<sup>-1</sup>, temperature: 673 K, WHSV: 4.7 h<sup>-1</sup>, loading amount: 5 wt%.

\*The others were CH<sub>4</sub> and CO produced by the decomposition reaction of EtOH.

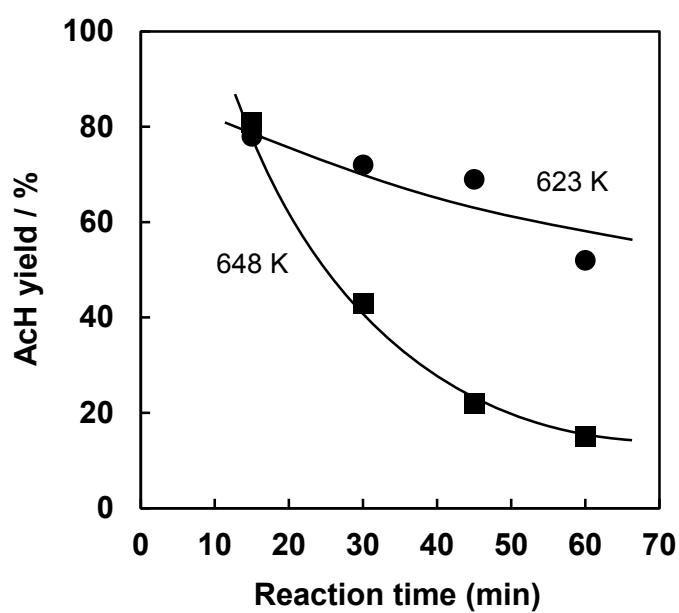

**Figure S4** AcH yield of the Cu/SiO<sub>2</sub> catalyst as a function of reaction time at 623 and 648 K.

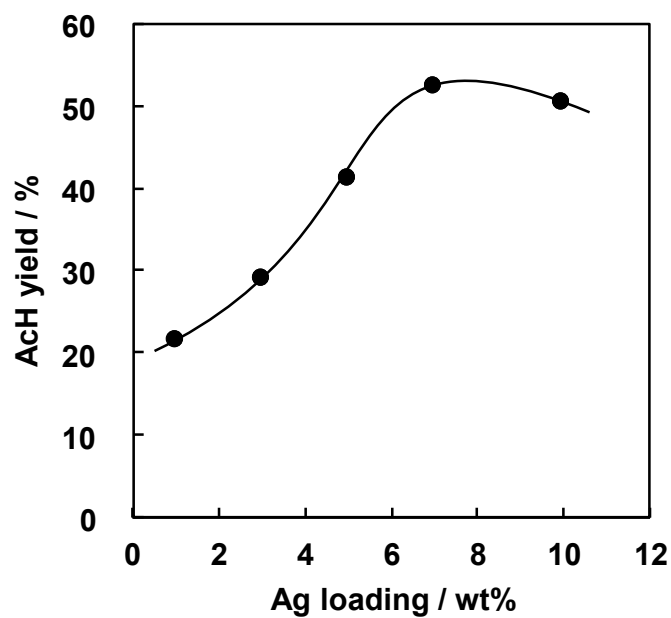

**Figure S5** Effect of Ag loading on the AcH yield of the Ag/SiO<sub>2</sub> catalyst. EtOH feed rate: 0.03 mL min<sup>-1</sup>, carrier gas (N<sub>2</sub>) feed rate: 10 mL min<sup>-1</sup>, WHSV: 4.7 h<sup>-1</sup>, Reaction temperature: 598 K.

**Table S3** EtOH/AcH conversion reactions with various SiO<sub>2</sub> supported catalysts prepared using a high-throughput system.

| Catalyst                        | Conversion / % | BD yield / % | Selectivity / % |          |                |           |                |        |
|---------------------------------|----------------|--------------|-----------------|----------|----------------|-----------|----------------|--------|
|                                 |                |              | BD              | Ethylene | Crotonaldehyde | 1-Butanol | Crotyl alcohol | Others |
| HfO <sub>2</sub>                | 56             | 32           | 57              | 1        | 4              | 2         | 2              | 34     |
| ZrO <sub>2</sub>                | 56             | 31           | 55              | 1        | 4              | 2         | 2              | 36     |
| Al <sub>2</sub> O <sub>3</sub>  | 49             | 15           | 32              | 40       | 3              | 0         | 2              | 24     |
| Sc <sub>2</sub> O <sub>3</sub>  | 39             | 14           | 36              | 3        | 14             | 4         | 4              | 39     |
| Nb <sub>2</sub> O <sub>5</sub>  | 33             | 12           | 35              | 11       | 15             | 1         | 2              | 36     |
| Ga <sub>2</sub> O <sub>3</sub>  | 31             | 11           | 34              | 25       | 7              | 2         | 0              | 32     |
| Lu <sub>2</sub> O <sub>3</sub>  | 25             | 5            | 20              | 2        | 26             | 2         | 1              | 50     |
| Tm <sub>2</sub> O <sub>3</sub>  | 27             | 4            | 14              | 1        | 28             | 2         | 1              | 54     |
| Y <sub>2</sub> O <sub>3</sub>   | 27             | 4            | 14              | 1        | 32             | 2         | 1              | 50     |
| Er <sub>2</sub> O <sub>3</sub>  | 26             | 4            | 14              | 1        | 33             | 2         | 2              | 49     |
| Cr <sub>2</sub> O <sub>3</sub>  | 20             | 4            | 18              | 4        | 33             | 2         | 3              | 41     |
| MgO                             | 23             | 3            | 14              | 3        | 39             | 1         | 1              | 42     |
| ZnO                             | 19             | 3            | 16              | 4        | 38             | 1         | 1              | 40     |
| Dy <sub>2</sub> O <sub>3</sub>  | 24             | 3            | 11              | 1        | 32             | 1         | 2              | 52     |
| Tb <sub>4</sub> O <sub>7</sub>  | 23             | 3            | 11              | 1        | 33             | 1         | 2              | 52     |
| Ta <sub>2</sub> O <sub>5</sub>  | 13             | 2            | 18              | 2        | 29             | 0         | 2              | 49     |
| TiO <sub>2</sub>                | 30             | 2            | 7               | 2        | 26             | 1         | 3              | 60     |
| Gd <sub>2</sub> O <sub>3</sub>  | 23             | 2            | 9               | 1        | 36             | 1         | 2              | 51     |
| MoO <sub>3</sub>                | 21             | 2            | 9               | 54       | 9              | 0         | 0              | 28     |
| Sm <sub>2</sub> O <sub>3</sub>  | 19             | 2            | 9               | 1        | 48             | 1         | 2              | 39     |
| V <sub>2</sub> O <sub>5</sub>   | 23             | 2            | 7               | 30       | 32             | 1         | 1              | 29     |
| Pr <sub>6</sub> O <sub>11</sub> | 19             | 1            | 7               | 1        | 48             | 1         | 2              | 41     |
| Fe <sub>2</sub> O <sub>3</sub>  | 12             | 1            | 10              | 3        | 57             | 0         | 1              | 29     |
| Nd <sub>2</sub> O <sub>3</sub>  | 19             | 1            | 6               | 1        | 44             | 1         | 2              | 47     |
| Eu <sub>2</sub> O <sub>3</sub>  | 19             | 1            | 5               | 1        | 42             | 1         | 3              | 48     |
| La <sub>2</sub> O <sub>3</sub>  | 5              | 0            | 8               | 1        | 39             | 1         | 1              | 50     |
| MnO <sub>2</sub>                | 11             | 0            | 2               | 1        | 55             | 0         | 4              | 38     |
| Ag                              | 7              | 0            | 3               | 8        | 26             | 1         | 0              | 62     |
| Pb <sub>3</sub> O <sub>4</sub>  | 7              | 0            | 2               | 1        | 54             | 0         | 6              | 38     |
| ReO <sub>3</sub>                | 3              | 0            | 3               | 4        | 34             | 0         | 3              | 56     |
| SnO <sub>2</sub>                | 3              | 0            | 3               | 28       | 11             | 3         | 1              | 54     |
| CeO <sub>2</sub>                | 7              | 0            | 1               | 1        | 60             | 0         | 3              | 35     |
| CaO                             | 17             | 0            | 0               | 0        | 53             | 0         | 2              | 44     |
| In <sub>2</sub> O <sub>3</sub>  | 3              | 0            | 2               | 6        | 61             | 0         | 2              | 29     |
| Co <sub>3</sub> O <sub>4</sub>  | 3              | 0            | 1               | 1        | 65             | 0         | 3              | 30     |
| Au                              | 4              | 0            | 1               | 1        | 64             | 0         | 4              | 31     |
| NiO                             | 2              | 0            | 1               | 1        | 71             | 0         | 6              | 21     |
| CuO                             | 2              | 0            | 1               | 3        | 40             | 0         | 1              | 55     |
| IrO <sub>2</sub>                | 4              | 0            | 0               | 66       | 12             | 0         | 1              | 20     |
| SrO                             | 16             | 0            | 0               | 0        | 53             | 0         | 1              | 46     |
| Rb <sub>2</sub> O               | 13             | 0            | 0               | 2        | 55             | 0         | 0              | 43     |
| BaO                             | 6              | 0            | 0               | 1        | 53             | 0         | 1              | 45     |
| PdO                             | 2              | 0            | 0               | 2        | 66             | 0         | 3              | 28     |
| RuO <sub>2</sub>                | 2              | 0            | 0               | 5        | 51             | 0         | 2              | 42     |
| Rh <sub>2</sub> O <sub>3</sub>  | 2              | 0            | 0               | 5        | 69             | 0         | 3              | 23     |
| Cs <sub>2</sub> O               | 8              | 0            | 0               | 2        | 61             | 0         | 0              | 37     |
| LiO <sub>2</sub>                | 6              | 0            | 0               | 0        | 73             | 0         | 1              | 26     |
| Na <sub>2</sub> O               | 6              | 0            | 0               | 1        | 68             | 0         | 0              | 30     |
| K <sub>2</sub> O                | 3              | 0            | 0               | 1        | 25             | 2         | 0              | 72     |

Reaction conditions: EtOH/AcH: 50/50 molar ratio, feed rate: 0.03 mL min<sup>-1</sup>, carrier gas (N<sub>2</sub>) feed rate: 10 mL min<sup>-1</sup>, temperature: 623 K, WHSV: 4.7 h<sup>-1</sup>, loading amount: 5 wt%.

**Table S4** EtOH/AcH conversion reactions with various SiO<sub>2</sub> supported catalysts prepared using a high-throughput system.

| Catalyst                        | Conversion / % | BD yield / % | Selectivity / % |          |                |           |                |        |
|---------------------------------|----------------|--------------|-----------------|----------|----------------|-----------|----------------|--------|
|                                 |                |              | BD              | Ethylene | Crotonaldehyde | 1-Butanol | Crotyl alcohol | Others |
| HfO <sub>2</sub>                | 67             | 41           | 61              | 4        | 2              | 1         | 1              | 31     |
| ZrO <sub>2</sub>                | 68             | 40           | 58              | 3        | 1              | 2         | 2              | 34     |
| Sc <sub>2</sub> O <sub>3</sub>  | 55             | 22           | 40              | 7        | 4              | 3         | 3              | 43     |
| Al <sub>2</sub> O <sub>3</sub>  | 59             | 13           | 21              | 57       | 2              | 0         | 1              | 18     |
| Ga <sub>2</sub> O <sub>3</sub>  | 42             | 12           | 30              | 46       | 5              | 0         | 0              | 20     |
| Lu <sub>2</sub> O <sub>3</sub>  | 38             | 11           | 28              | 5        | 11             | 4         | 1              | 52     |
| Y <sub>2</sub> O <sub>3</sub>   | 40             | 11           | 26              | 4        | 10             | 4         | 1              | 55     |
| Tm <sub>2</sub> O <sub>3</sub>  | 37             | 10           | 27              | 4        | 12             | 4         | 1              | 53     |
| Er <sub>2</sub> O <sub>3</sub>  | 35             | 10           | 27              | 4        | 15             | 4         | 1              | 49     |
| Nb <sub>2</sub> O <sub>5</sub>  | 48             | 9            | 18              | 46       | 11             | 0         | 1              | 23     |
| Dy <sub>2</sub> O <sub>3</sub>  | 32             | 9            | 26              | 4        | 19             | 4         | 1              | 46     |
| MgO                             | 32             | 8            | 26              | 11       | 19             | 2         | 1              | 41     |
| Tb <sub>4</sub> O <sub>7</sub>  | 32             | 8            | 25              | 3        | 14             | 5         | 1              | 52     |
| Gd <sub>2</sub> O <sub>3</sub>  | 34             | 8            | 24              | 4        | 16             | 4         | 1              | 52     |
| Cr <sub>2</sub> O <sub>3</sub>  | 30             | 8            | 26              | 13       | 16             | 2         | 1              | 42     |
| ZnO                             | 32             | 6            | 20              | 9        | 24             | 1         | 0              | 47     |
| Sm <sub>2</sub> O <sub>3</sub>  | 31             | 6            | 20              | 3        | 20             | 3         | 1              | 52     |
| Ta <sub>2</sub> O <sub>5</sub>  | 18             | 6            | 32              | 6        | 22             | 1         | 1              | 38     |
| Eu <sub>2</sub> O <sub>3</sub>  | 27             | 5            | 19              | 3        | 24             | 3         | 2              | 49     |
| Pr <sub>6</sub> O <sub>11</sub> | 26             | 4            | 16              | 2        | 27             | 3         | 2              | 50     |
| Nd <sub>2</sub> O <sub>3</sub>  | 26             | 4            | 15              | 2        | 27             | 2         | 1              | 51     |
| TiO <sub>2</sub>                | 31             | 3            | 11              | 10       | 19             | 3         | 3              | 55     |
| MoO <sub>3</sub>                | 30             | 3            | 9               | 71       | 5              | 0         | 0              | 16     |
| V <sub>2</sub> O <sub>5</sub>   | 35             | 2            | 6               | 55       | 17             | 0         | 1              | 21     |
| ReO <sub>3</sub>                | 11             | 2            | 20              | 6        | 39             | 1         | 2              | 32     |
| MnO <sub>2</sub>                | 17             | 2            | 12              | 3        | 37             | 1         | 3              | 43     |
| Fe <sub>2</sub> O <sub>3</sub>  | 19             | 2            | 11              | 19       | 30             | 1         | 0              | 39     |
| La <sub>2</sub> O <sub>3</sub>  | 8              | 2            | 24              | 5        | 17             | 4         | 1              | 49     |
| CaO                             | 20             | 0            | 2               | 2        | 46             | 0         | 2              | 47     |
| CeO <sub>2</sub>                | 10             | 0            | 4               | 2        | 53             | 0         | 3              | 37     |
| Co <sub>3</sub> O <sub>4</sub>  | 8              | 0            | 5               | 3        | 49             | 0         | 4              | 39     |
| Au                              | 6              | 0            | 4               | 5        | 54             | 0         | 4              | 33     |
| Ag                              | 8              | 0            | 2               | 21       | 19             | 0         | 0              | 58     |
| NiO                             | 4              | 0            | 3               | 3        | 63             | 1         | 7              | 23     |
| SrO                             | 17             | 0            | 1               | 2        | 49             | 0         | 2              | 47     |
| In <sub>2</sub> O <sub>3</sub>  | 3              | 0            | 3               | 18       | 38             | 1         | 2              | 38     |
| SnO <sub>2</sub>                | 3              | 0            | 3               | 50       | 9              | 1         | 1              | 37     |
| Pb <sub>3</sub> O <sub>4</sub>  | 2              | 0            | 3               | 10       | 47             | 0         | 5              | 35     |
| Rb <sub>2</sub> O               | 20             | 0            | 0               | 11       | 31             | 0         | 0              | 58     |
| K <sub>2</sub> O                | 17             | 0            | 0               | 5        | 49             | 0         | 0              | 45     |
| PdO                             | 3              | 0            | 1               | 5        | 58             | 0         | 4              | 32     |
| BaO                             | 6              | 0            | 0               | 2        | 57             | 0         | 2              | 38     |
| Cs <sub>2</sub> O               | 13             | 0            | 0               | 10       | 44             | 0         | 0              | 45     |
| CuO                             | 1              | 0            | 1               | 12       | 32             | 0         | 2              | 54     |
| IrO <sub>2</sub>                | 2              | 0            | 0               | 9        | 62             | 0         | 3              | 26     |
| RuO <sub>2</sub>                | 2              | 0            | 0               | 13       | 49             | 0         | 3              | 35     |
| Na <sub>2</sub> O               | 9              | 0            | 0               | 2        | 67             | 0         | 0              | 31     |
| Rh <sub>2</sub> O <sub>3</sub>  | 2              | 0            | 0               | 10       | 59             | 0         | 3              | 28     |
| LiO <sub>2</sub>                | 4              | 0            | 0               | 1        | 46             | 0         | 1              | 52     |

Reaction conditions: EtOH/AcH: 50/50 molar ratio, feed rate: 0.03 mL min<sup>-1</sup>, carrier gas (N<sub>2</sub>) feed rate: 10 mL min<sup>-1</sup>, temperature: 673 K, WHSV: 4.7 h<sup>-1</sup>, loading amount: 5 wt%.

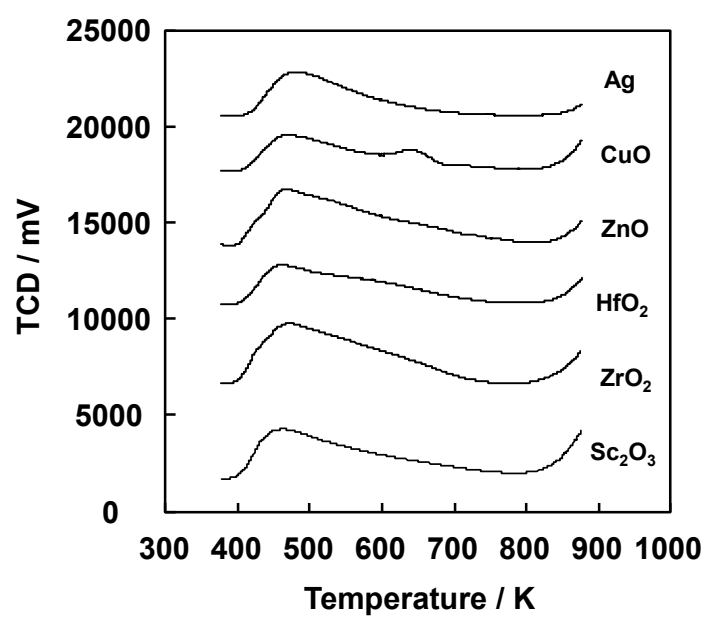

**Figure S6** NH<sub>3</sub>-TPD of silica-supported Ag, CuO, ZnO, HfO<sub>2</sub>, ZrO<sub>2</sub> and Sc<sub>2</sub>O<sub>3</sub> catalysts.

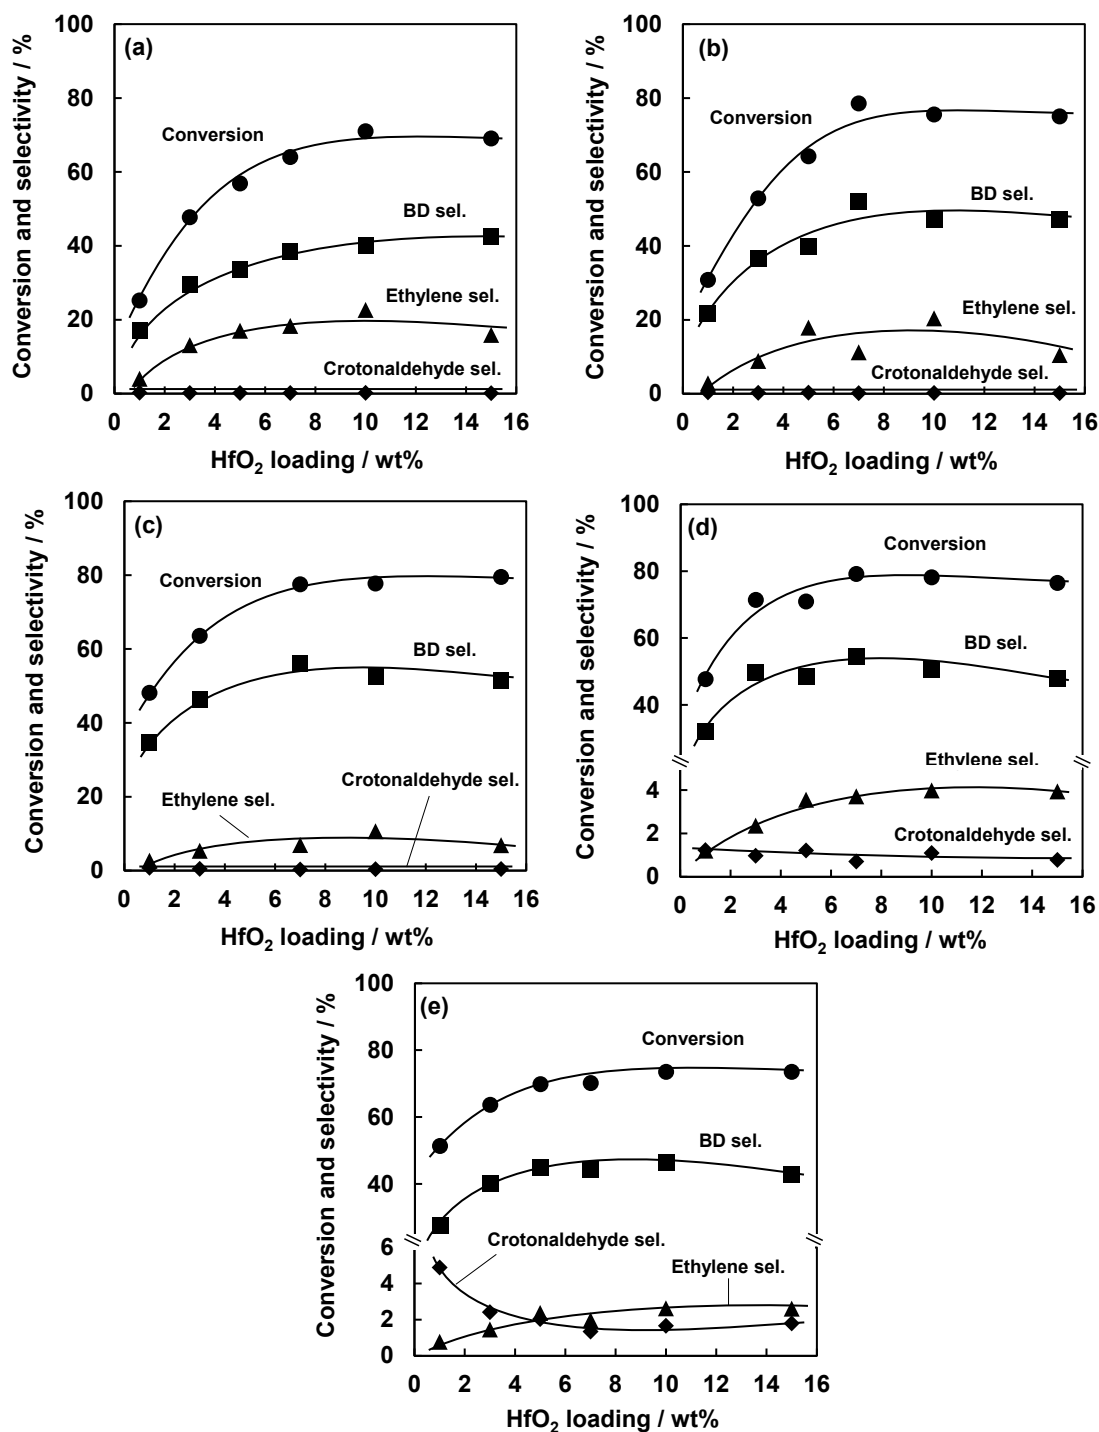

**Figures S7** Effects of  $\text{EtOH}/\text{AcH}$  molar ratio and  $\text{HfO}_2$  loading on the catalytic activity of  $\text{HfO}_2/\text{SiO}_2$  catalysts.  $\text{EtOH}/\text{AcH}$ : (a) 75/25 (3.0), (b) 70/30 (2.3), (c) 60/40 (1.5), (d) 50/50 (1.0), and (e) 40/60 (0.67),  $\text{EtOH}/\text{AcH}$  mixture feed rate:  $0.03 \text{ mL min}^{-1}$ , carrier gas ( $\text{N}_2$ ) feed rate:  $10 \text{ mL min}^{-1}$ , WHSV:  $4.7 \text{ h}^{-1}$ , Reaction temperature: 623 K.

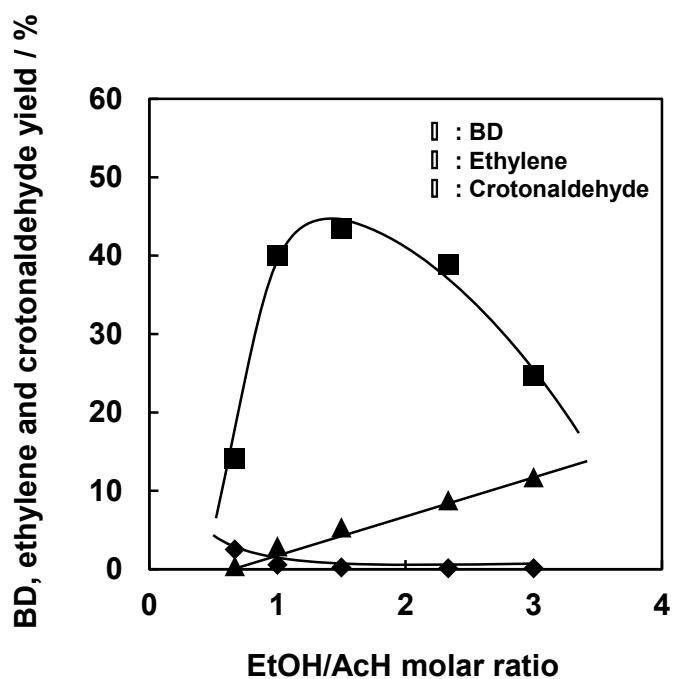

**Figure S8** Effect of EtOH/AcH molar ratio on the catalytic activity of 7 wt% HfO<sub>2</sub>/SiO<sub>2</sub> catalyst. EtOH/AcH mixture feed rate: 0.03 mL min<sup>-1</sup>, carrier gas (N<sub>2</sub>) feed rate: 10 mL min<sup>-1</sup>, WHSV: 4.7 h<sup>-1</sup>, Reaction temperature: 623 K.

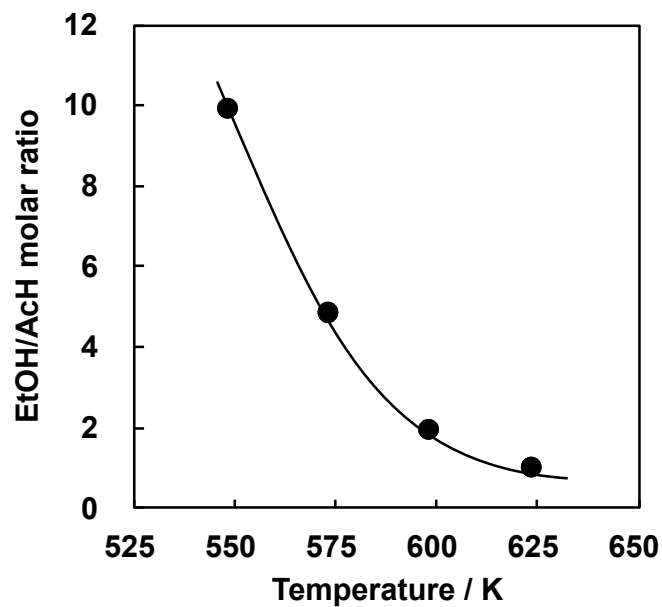

**Figure S9** Effect of reaction temperature on the EtOH conversion (EtOH/AcH ratio) of the Ag/SiO<sub>2</sub> catalyst. EtOH feed rate: 0.03 mL min<sup>-1</sup>, carrier gas (N<sub>2</sub>) feed rate: 10 mL min<sup>-1</sup>, WHSV: 4.7 h<sup>-1</sup>, Ag loading: 7 wt%.

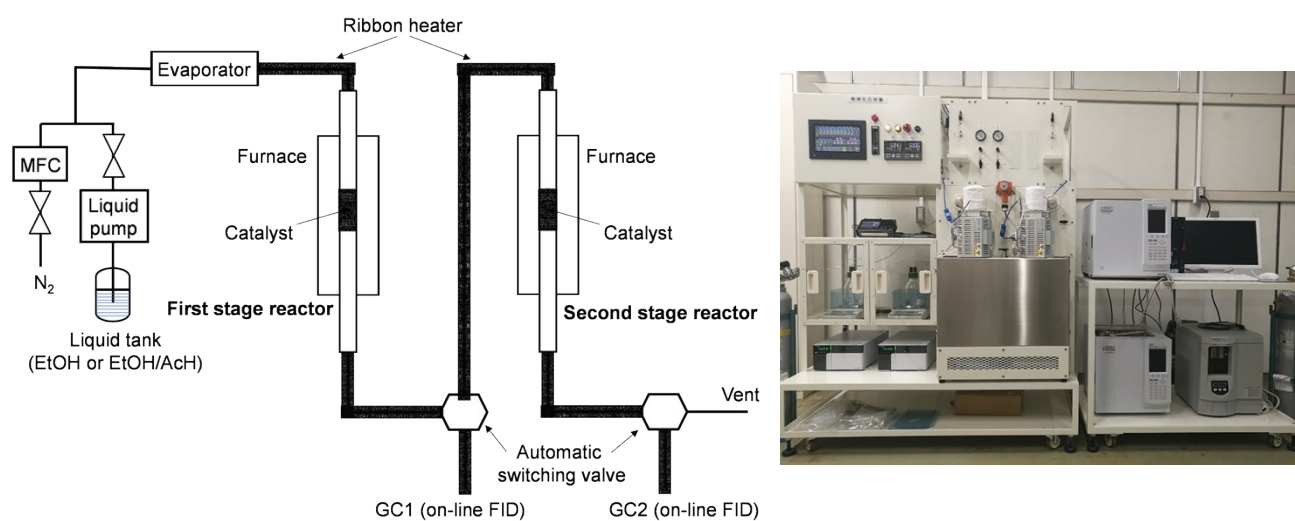

**Figure S10** Flowchart and photograph of the two-stage tandem reactor system.

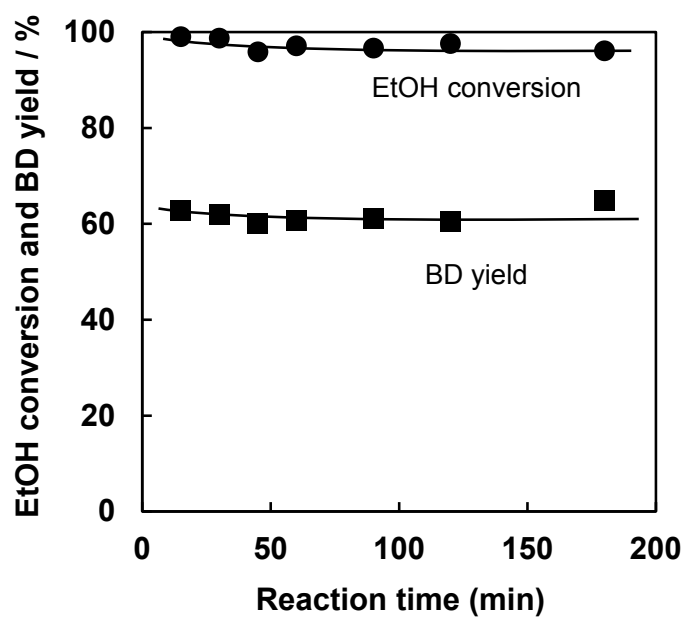

**Figure S11** Activity of the Ag/SiO<sub>2</sub> + HFO<sub>2</sub>/SiO<sub>2</sub> catalyst using the two-stage tandem reactor system as a function of reaction time.
